# Supplementary material for: Efficient elimination of Cr(vi) in groundwater using nano zero-valent iron synthesized with Ginkgo biloba extracts: enhanced mechanism and reduced toxicity
Source: Royal Society of Chemistry journal article supplement (doi:10.1039/d3ew00479a), 2023-10-17
Supplement: d3ew00479a1.pdf [file d3ew00479a1.pdf]

## Supporting Information

# Efficient elimination of Cr(VI) in aqueous phase using nano zero-valent iron synthesized with Ginkgo biloba extracts: Enhanced mechanism and reduced toxicity

Ting Li<sup>1</sup>, Fang Zhu<sup>\*,1</sup>, Yaqin Gao<sup>1</sup>, Marie Rose IRIBAGIZA<sup>1</sup>, Guangyao Hu<sup>1</sup>, Jian  
Guan<sup>2</sup>

1. College of Environmental Science and Engineering, Taiyuan University of  
Technology, Jinzhong, Shanxi, P.R. China 030600

2. Yunnan Research Academy of Eco-environmental Sciences, Kunming, Yunnan, P.R.  
China, 650506

\*Corresponding author. E-mail address: zhufang@tyut.edu.cn

College of Environmental Science and Engineering, Taiyuan University of  
Technology, Jinzhong,  
Shanxi 030600, P. R. China

Equation S1:

$$\eta = \frac{C_0 - C_t}{C_0} \times 100\%$$

Where  $C_0$  and  $C_t$  are the initial concentration of Cr(VI) in the solution and the concentration measured at time  $t$  (mg/L) and  $\eta$  represents the removal rate of Cr(VI)  
Equation S2:

$$\ln \frac{C_t}{C_0} = -k_1 t$$

Equation S3:

$$\frac{t}{q_t} = \frac{1}{k_2 q_e^2} + \frac{t}{q_e}$$

Equation S4:

$$Q_t = k_3 t^{0.5} + C$$

Equation S5:

$$Q_t = \left(\frac{1}{\beta}\right) \ln(\alpha\beta) + \left(\frac{1}{\beta}\right) \ln(t)$$

Where  $C_0$  and  $C_t$  represent the initial concentration of Cr(VI) and the concentration at time  $t$  (mg/L), respectively.  $q_e$  (mg/g) and  $q_t$  (mg/g) are the removal capacities of Cr(VI) at equilibrium and time  $t$ , respectively.  $k_1$  ( $\text{min}^{-1}$ ) reflects the rate constant for the pseudo-first order reaction.  $k_2$  ( $\text{g}/\text{mg} \cdot \text{min}$ ) represents the rate constant of the pseudo-secondary reaction.  $k_3$  ( $\text{mg}/\text{g} \cdot \text{min}^{0.5}$ ).  $C$  is the rate constants and the corresponding Y-axis intercepts ( $q_t \cdot t^{0.5}$ ) in the intraparticle diffusion model.  $\alpha$  ( $\text{mg}/\text{g} \cdot \text{min}$ ) and  $\beta$  (mg/g) represent the constants of the Elovich model.

## Table

Table S1 Fitting parameters of the four kinetic models for the removal of Cr(VI) using GB-nZVI at different pH conditions

| pH | t/min | Pseudo-first-order             |       | Pseudo-second-order                                            |       | Intra-particle diffusion                                         |       | Elovich                              |       |
|----|-------|--------------------------------|-------|----------------------------------------------------------------|-------|------------------------------------------------------------------|-------|--------------------------------------|-------|
|    |       | $k_1$<br>( $\text{min}^{-1}$ ) | $R^2$ | $k_2$<br>( $\text{g}\cdot\text{mg}^{-1}\cdot\text{min}^{-1}$ ) | $R^2$ | $k_3$<br>( $\text{g}\cdot\text{mg}^{-1}\cdot\text{min}^{-1/2}$ ) | $R^2$ | $\beta(\text{mg}\cdot\text{g}^{-1})$ | $R^2$ |
| 3  | 0-3   |                                |       |                                                                |       | 2.754                                                            | 0.751 |                                      |       |
|    | 5-15  | 0.657                          | 0.994 | 1.010                                                          | 0.999 | 0.057                                                            | 0.819 | 4.694                                | 0.926 |
|    | 20-30 |                                |       |                                                                |       | 0.013                                                            | 0.865 |                                      |       |
| 5  | 0-3   |                                |       |                                                                |       | 1.023                                                            | 0.999 |                                      |       |
|    | 5-15  | 0.204                          | 0.989 | 0.200                                                          | 0.889 | 0.662                                                            | 0.898 | 1.094                                | 0.985 |
|    | 20-30 |                                |       |                                                                |       | 0.025                                                            | 0.813 |                                      |       |
| 7  | 0-3   |                                |       |                                                                |       | 0.502                                                            | 0.999 |                                      |       |
|    | 5-15  | 0.214                          | 0.983 | 0.210                                                          | 0.945 | 0.292                                                            | 0.989 | 2.327                                | 0.988 |
|    | 20-30 |                                |       |                                                                |       | 0.067                                                            | 0.933 |                                      |       |
| 9  | 0-3   |                                |       |                                                                |       | 0.321                                                            | 0.992 |                                      |       |
|    | 5-15  | 0.199                          | 0.965 | 0.198                                                          | 0.901 | 0.149                                                            | 0.618 | 3.375                                | 0.974 |
|    | 20-30 |                                |       |                                                                |       | 0.013                                                            | 0.775 |                                      |       |

## Figures

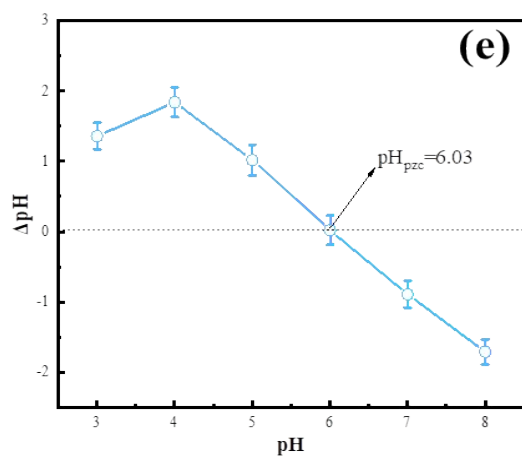

Fig. S1 Removal of Cr(VI) by GB-nZVI, ML-nZVI and HL-nZVI(a, b); Effect of pH (c) and temperature (d) on the removal of Cr(VI); and  $\text{pH}_{\text{pzc}}$  of GB-nZVI (e)

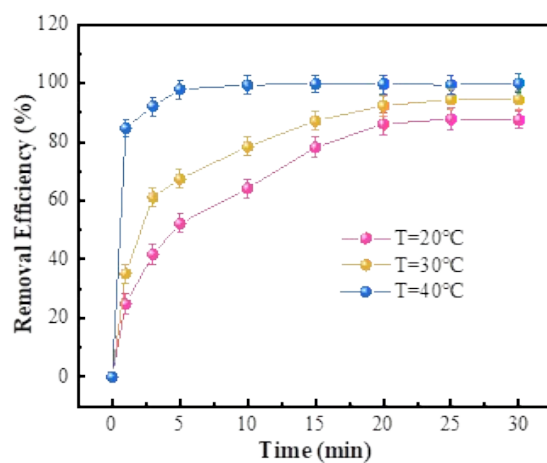

Fig. S2 Effect of temperature on the removal of Cr(VI)
